# Supplementary material for: Association Analysis between Genetic Variants of elovl5a and elovl5b and Poly-Unsaturated Fatty Acids in Common Carp (Cyprinus carpio)
Source: MDPI journal article supplement (doi:10.3390/biology11030466), 2022-03-18

**Figure S1. Genetic relationship among three strains.**

(A). Principal component analysis of the FRL, HHL and JL common carp strains, which were colored with different plots. The first and second axes explain 41.61% and 10.76% of the variance, respectively. (B). Population genetic structures of three strains with five cluster numbers ( $K = 2 \sim 6$ ). Each individual is showed with a vertical bar broken into different colored segments. Each color represents one ancestral population. The length of each colored segment shows the proportion of the ancestral population in one individual.

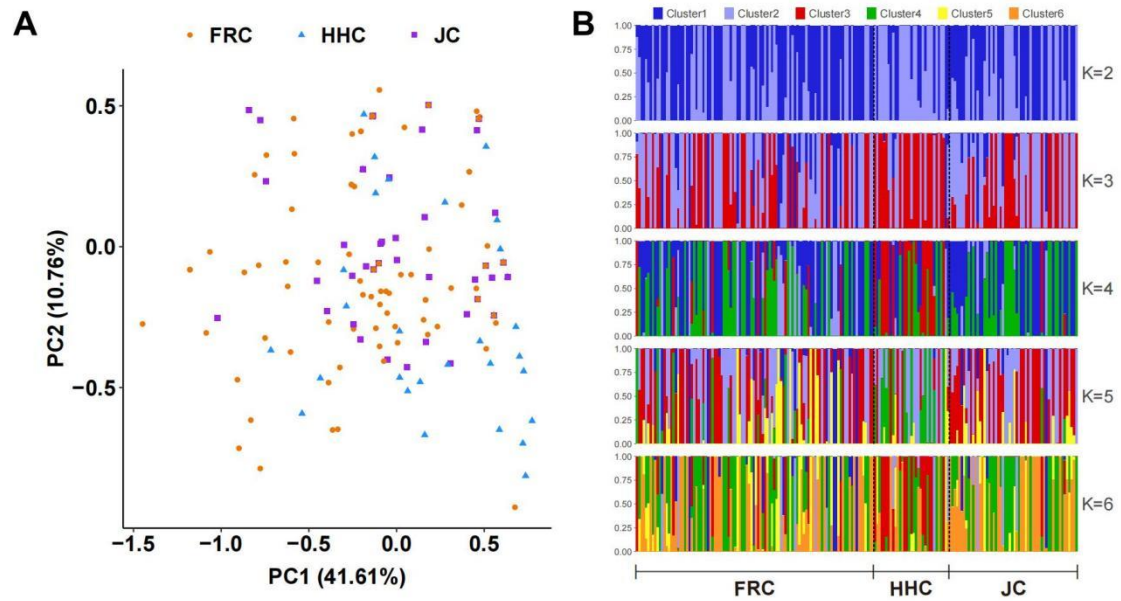

**Figure S2. Haplotype blocks in the coding regions of *elovl5a* and *elovl5b*.**

Linkage disequilibrium (LD) block structures in *elovl5a* (A) and *elovl5b* (B). The red color means tight linkage. The region surrounded with the black lines represents a haplotype block.

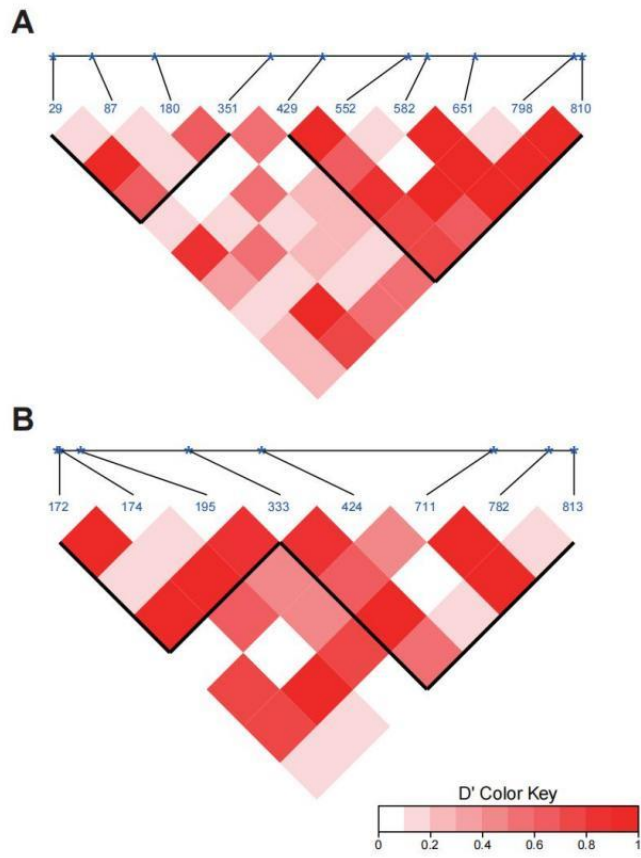

Supplement: s1 [file s1]
